# Supplementary material
Source: JCI journal article supplement (doi:10.1172/jci151390)
Supplement: sd1 [file 1]

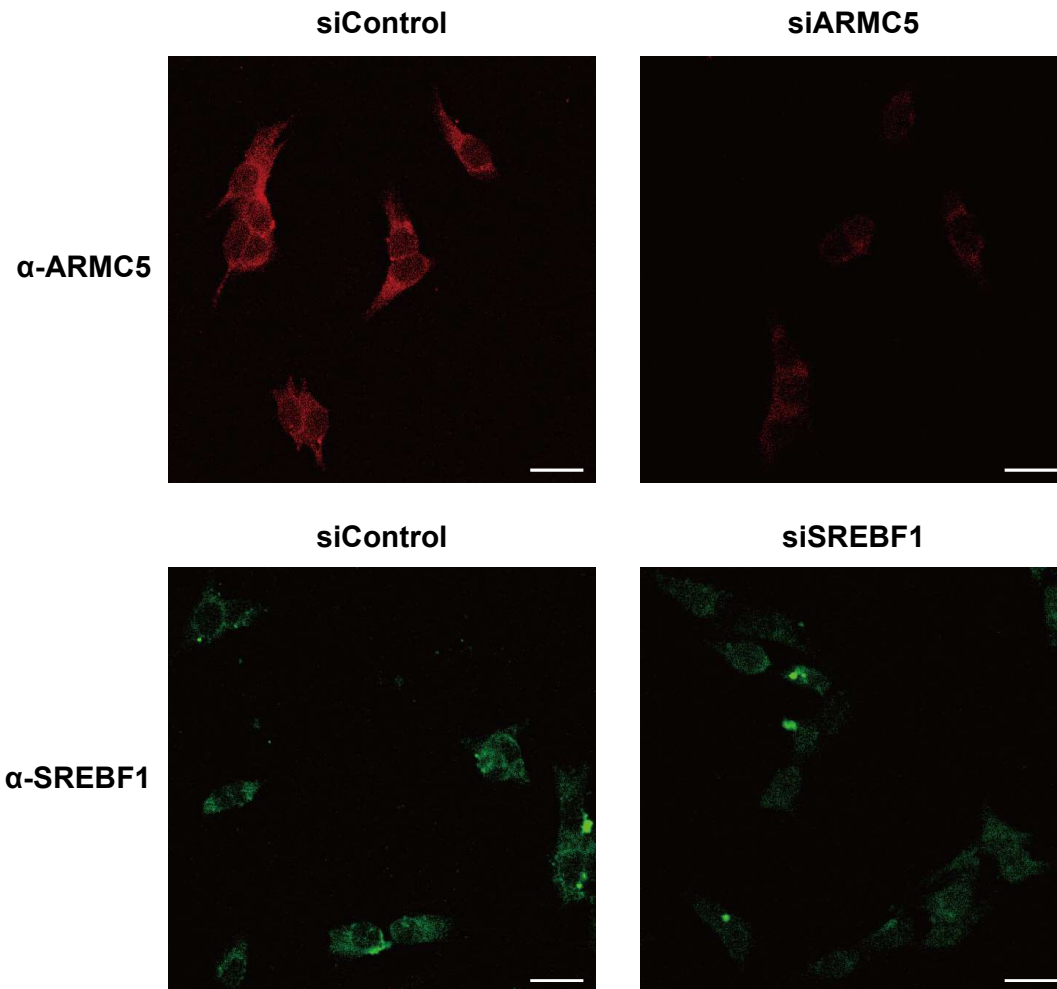

Supplementary Figure 1. Confocal microscopy of NCI-H295R adrenocortical cells transfected with negative control siRNA (siControl), siRNA targeting to ARMC5 (siARMC5) or SREBF1 (siSREBF1) for 48 hours, stained with Texas Red-anti-ARMC5 (red) or DyLight488-anti-SREBF1 (green). Scale bar; 20  $\mu$ m.

**A**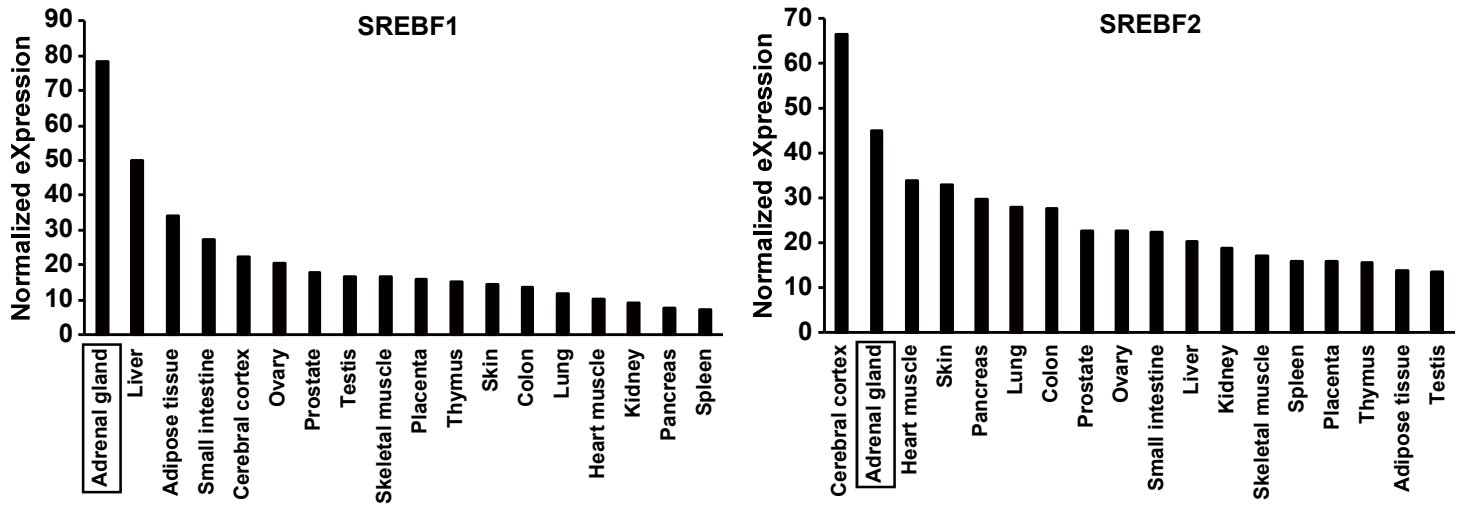**B**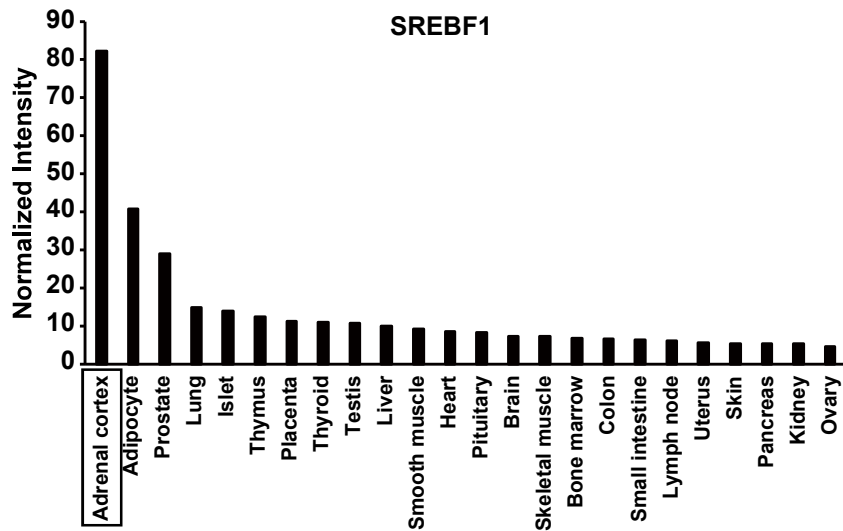

Supplementary Figure 2. A: RNA expression overview of the Consensus dataset from The Human Protein Atlas ([www.proteinatlas.org](http://www.proteinatlas.org)) of the indicated genes in the indicated human tissues. B: Gene expression/activity chart from BioGPS ([www.biogps.org](http://www.biogps.org)) of SREBF1 in the indicated human tissues.

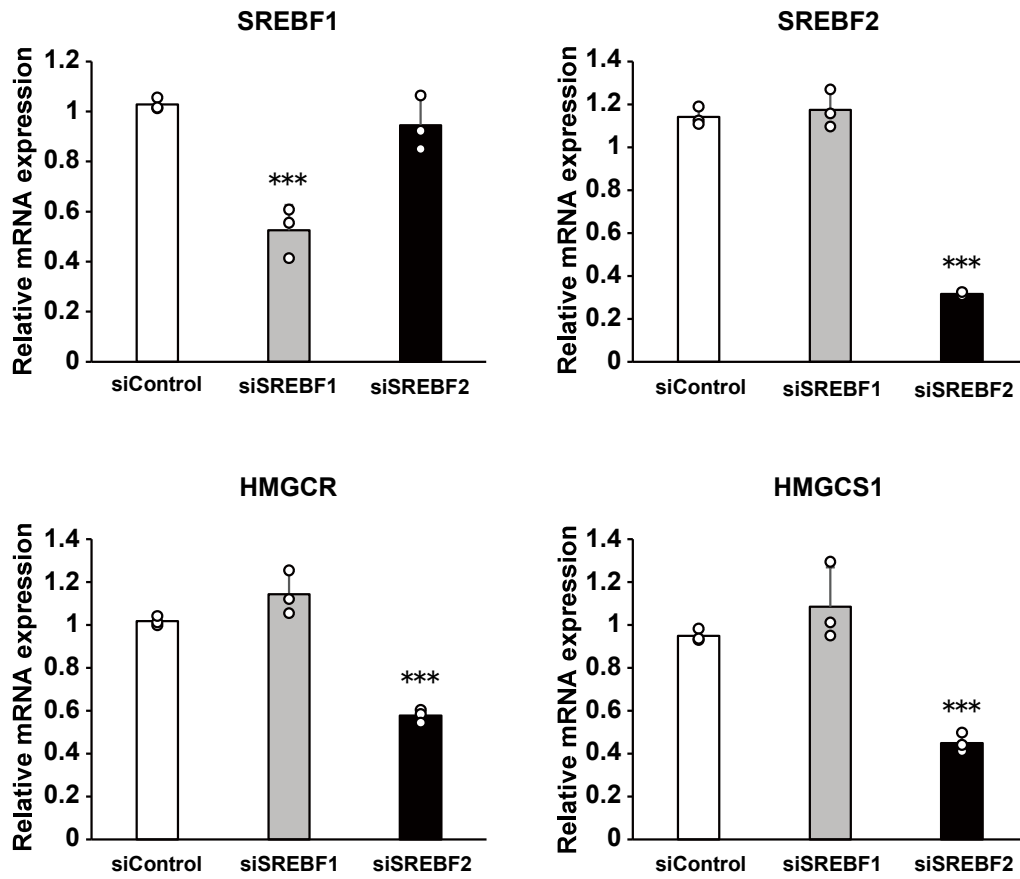

Supplementary Figure 3. Gene expression of indicated genes in H295R cells transfected with negative control siRNA (siControl), siRNA targeting to SREBF1 (siSREBF1) or SREBF2 (siSREBF2) for 48 hours (n=3, each). \*\*\*P<0.001, compared with siControl.

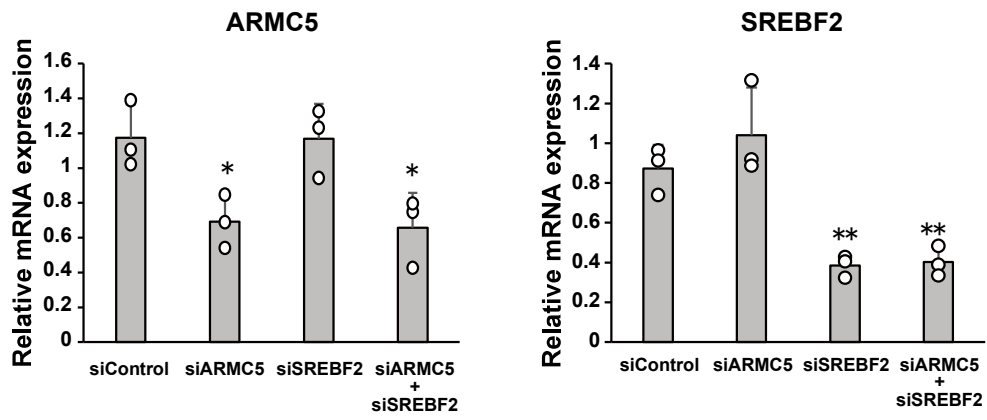

Supplementary Figure 4. Gene expression of the indicated genes in H295R cells transfected with negative control siRNA (siControl), siRNA targeting to ARMC5 (siARMC5) and/or siRNA targeting to SREBF2 (siSREBF2) for 72 hours (n=3, each). \*P<0.05; \*\*P<0.01, compared with siControl.

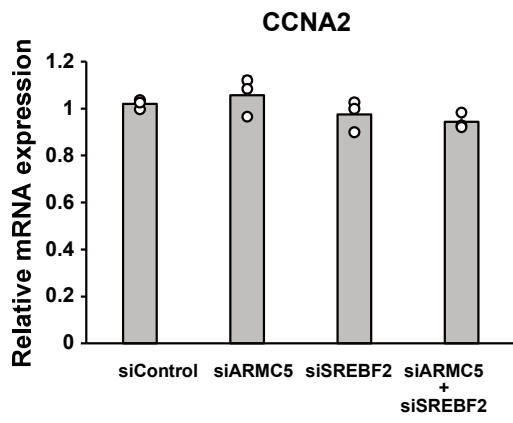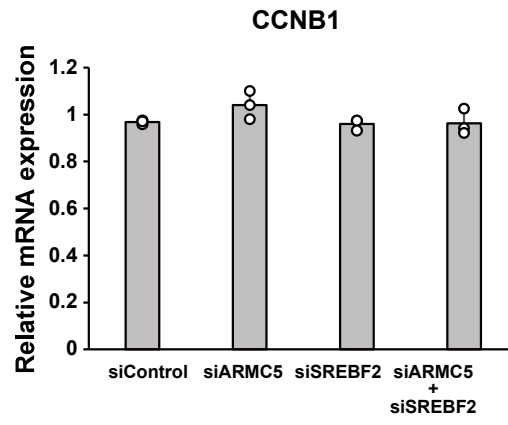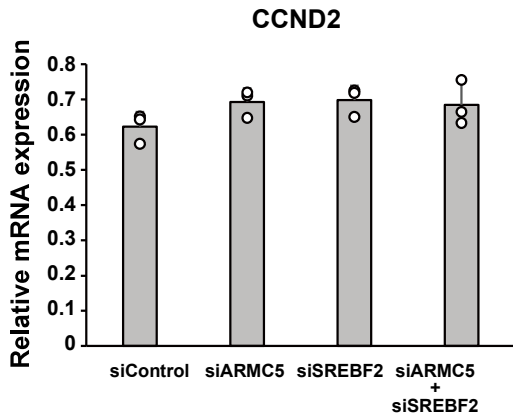

Supplementary Figure 5. Gene expression of the indicated genes in H295R cells transfected with negative control siRNA (siControl), siRNA targeting to ARMC5 (siARMC5) and/or siRNA targeting to SREBF2 (siSREBF2) for 72 hours (n=3, each).
